# Supplementary material for: Diel Protein Regulation of Marine Picoplanktonic Communities Assessed by Metaproteomics
Source: MDPI journal article supplement (doi:10.3390/microorganisms9122621), 2021-12-18
Supplement: s1 [file s1]

# Sample name: 8jSET18 - Metaproteome name: particle-attached day 1

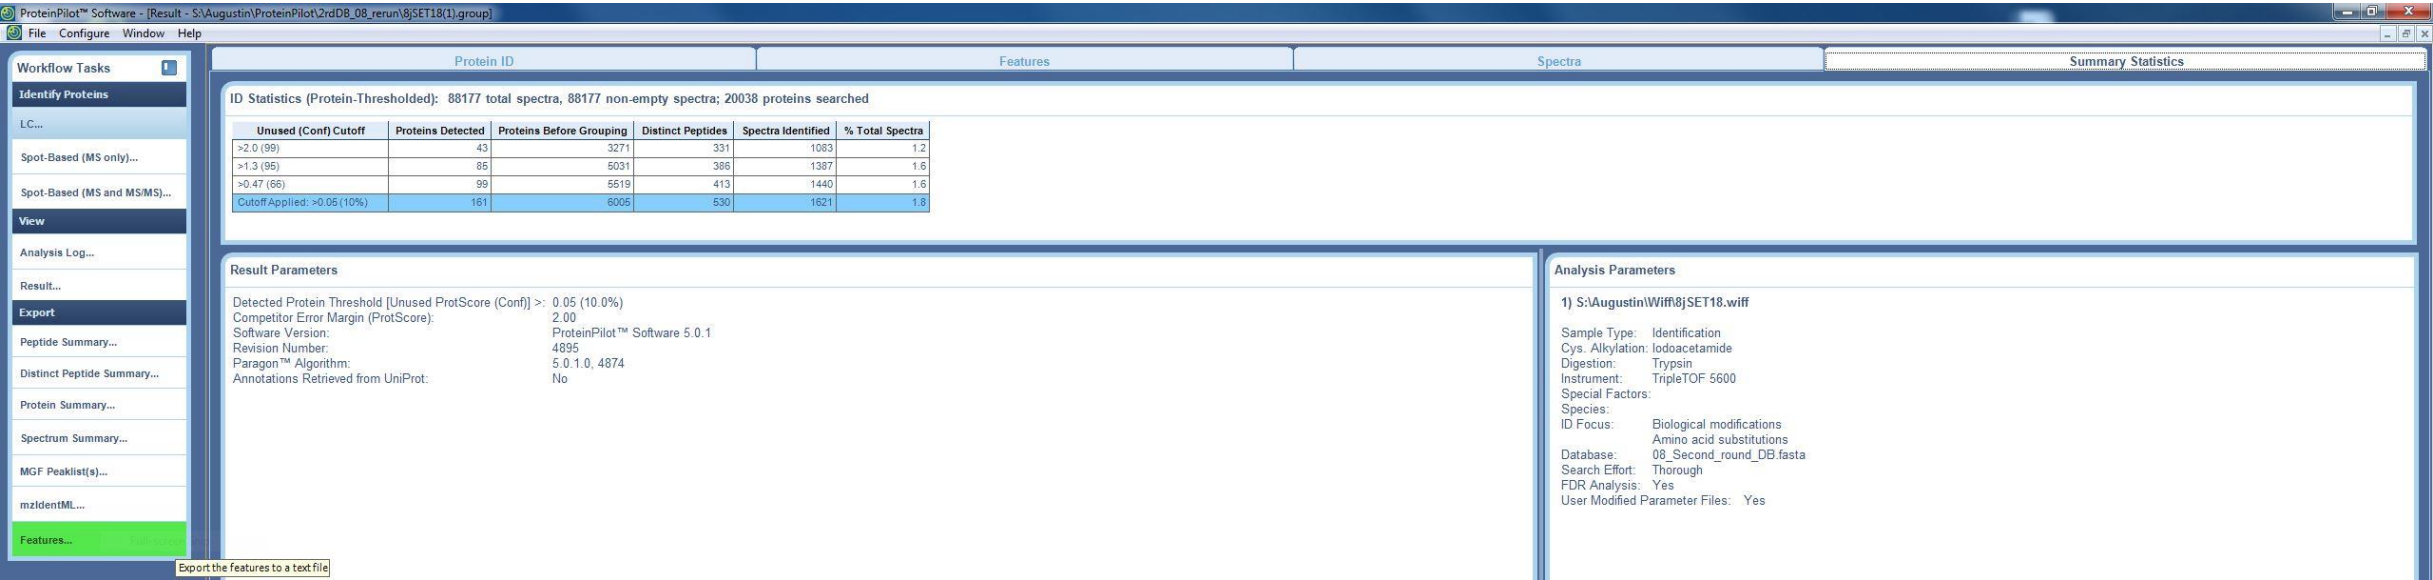

# Sample name: 8nSET19 - Metaproteome name: particle-attached night 1

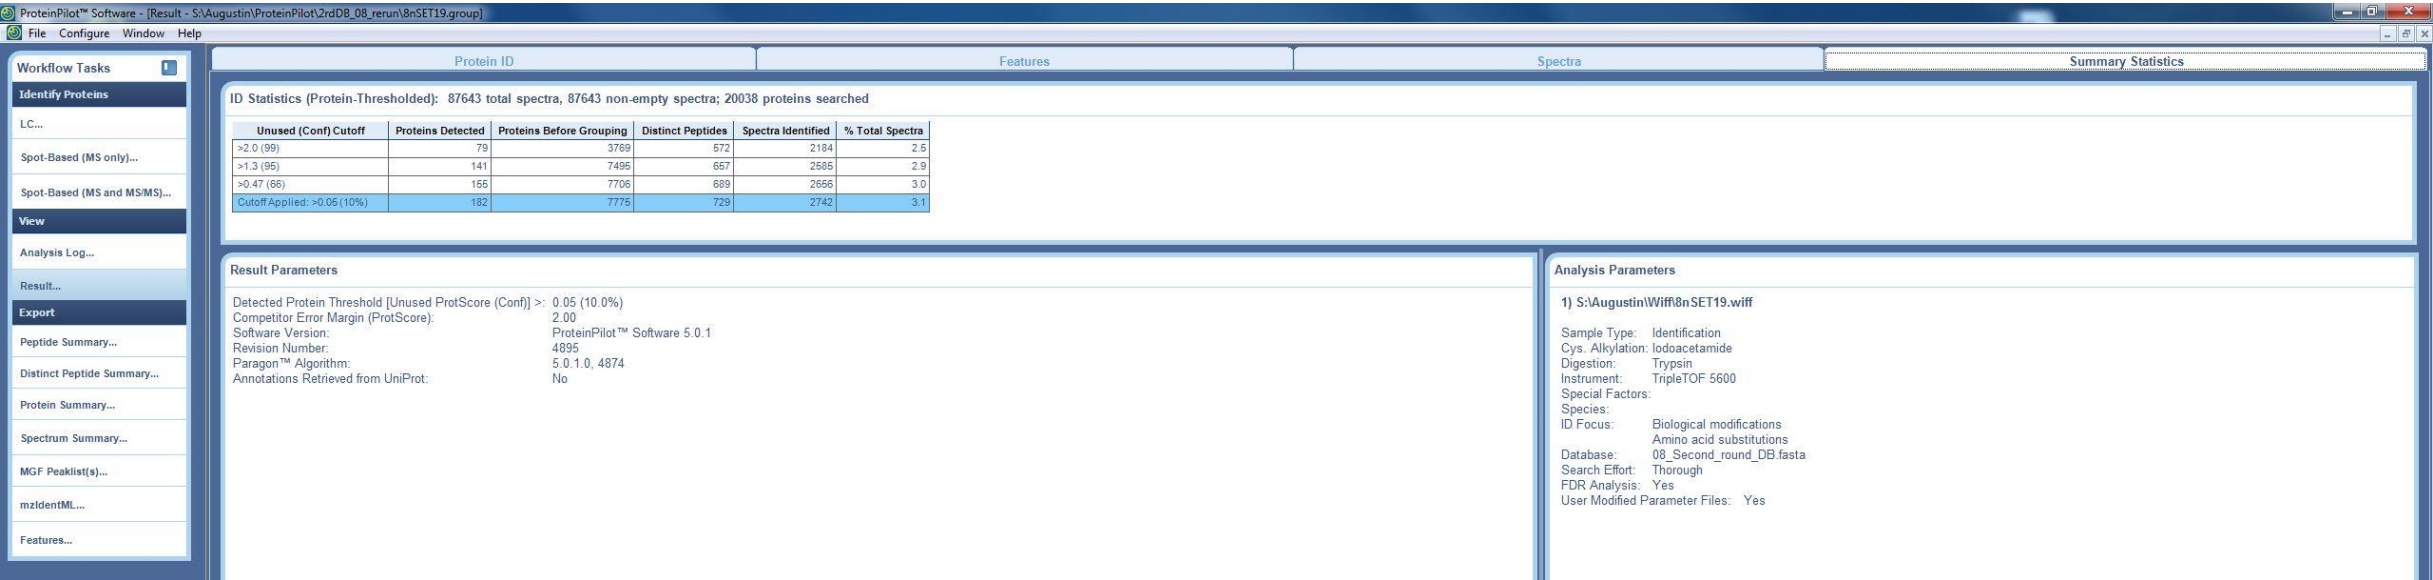

# Sample name: 8j2SET110 - Metaproteome name: particle-attached day 2

ProteinPilot™ Software - [Result - S:\Augustin\ProteinPilot2rdDB\_08\_rerun\8j2SET110.group]

FileConfigureWindowHelp

Workflow Tasks

Identify Proteins

LC...

Spot-Based (MS only)...

Spot-Based (MS and MS/MS)...

View

Analysis Log...

Result...

Export

Peptide Summary...

Distinct Peptide Summary...

Protein Summary...

Spectrum Summary...

MGF Peaklist(s)...

mzIdentML...

Features...

Protein IDFeaturesSpectraSummary Statistics

ID Statistics (Protein-Thresholded): 86844 total spectra, 86844 non-empty spectra; 20038 proteins searched

| Unused (Conf) Cutoff        | Proteins Detected | Proteins Before Grouping | Distinct Peptides | Spectra Identified | % Total Spectra |
|-----------------------------|-------------------|--------------------------|-------------------|--------------------|-----------------|
| >2.0 (99)                   | 81                | 2963                     | 701               | 3033               | 3.5             |
| >1.3 (95)                   | 137               | 6496                     | 786               | 3424               | 3.9             |
| >0.47 (66)                  | 150               | 5920                     | 817               | 3492               | 4.0             |
| Cutoff Applied: >0.05 (10%) | 197               | 8746                     | 900               | 3643               | 4.2             |

Result Parameters

Detected Protein Threshold [Unused ProtScore (Conf)] >: 0.05 (10.0%)  
Competitor Error Margin (ProtScore): 2.00  
Software Version: ProteinPilot™ Software 5.0.1  
Revision Number: 4895  
Paragon™ Algorithm: 5.0.1.0, 4874  
Annotations Retrieved from UniProt: No

Analysis Parameters

1) S:\Augustin\Wiff\8j2SET110.wiff

Sample Type: Identification  
Cys. Alkylation: Iodoacetamide  
Digestion: Trypsin  
Instrument: TripleTOF 5600  
Special Factors:  
Species:  
ID Focus: Biological modifications  
Amino acid substitutions  
Database: 08\_Second\_round\_DB.fasta  
Search Effort: Thorough  
FDR Analysis: Yes  
User Modified Parameter Files: Yes

# Sample name: 8n2SET111 - Metaproteome name: particle-attached night 2

ProteinPilot™ Software - [Result - S:\Augustin\ProteinPilot2rdDB\_08\_rerun\8n2SET111.group]

FileConfigureWindowHelp

Workflow Tasks

Identify Proteins

LC...

Spot-Based (MS only)...

Spot-Based (MS and MS/MS)...

View

Analysis Log...

Result...

Export

Peptide Summary...

Distinct Peptide Summary...

Protein Summary...

Spectrum Summary...

MGF Peaklist(s)...

mzIdentML...

Features...

Protein IDFeaturesSpectraSummary Statistics

ID Statistics (Protein-Thresholded): 86537 total spectra, 86537 non-empty spectra; 20038 proteins searched

| Unused (Conf) Cutoff        | Proteins Detected | Proteins Before Grouping | Distinct Peptides | Spectra Identified | % Total Spectra |
|-----------------------------|-------------------|--------------------------|-------------------|--------------------|-----------------|
| >2.0 (99)                   | 108               | 4485                     | 884               | 3791               | 4.4             |
| >1.3 (95)                   | 165               | 6638                     | 977               | 4251               | 4.9             |
| >0.47 (66)                  | 188               | 6964                     | 1018              | 4359               | 5.0             |
| Cutoff Applied: >0.05 (10%) | 236               | 7807                     | 1104              | 4609               | 5.2             |

Result Parameters

Detected Protein Threshold [Unused ProtScore (Conf)] >: 0.05 (10.0%)  
Competitor Error Margin (ProtScore): 2.00  
Software Version: ProteinPilot™ Software 5.0.1  
Revision Number: 4895  
Paragon™ Algorithm: 5.0.1.0, 4874  
Annotations Retrieved from UniProt: No

Analysis Parameters

1) S:\Augustin\Wiff\8n2SET111.wiff

Sample Type: Identification  
Cys. Alkylation: Iodoacetamide  
Digestion: Trypsin  
Instrument: TripleTOF 5600  
Special Factors:  
Species:  
ID Focus: Biological modifications  
Amino acid substitutions  
Database: 08\_Second\_round\_DB.fasta  
Search Effort: Thorough  
FDR Analysis: Yes  
User Modified Parameter Files: Yes

# Sample name: 2jSET11 - Metaproteome name: free-living day 1

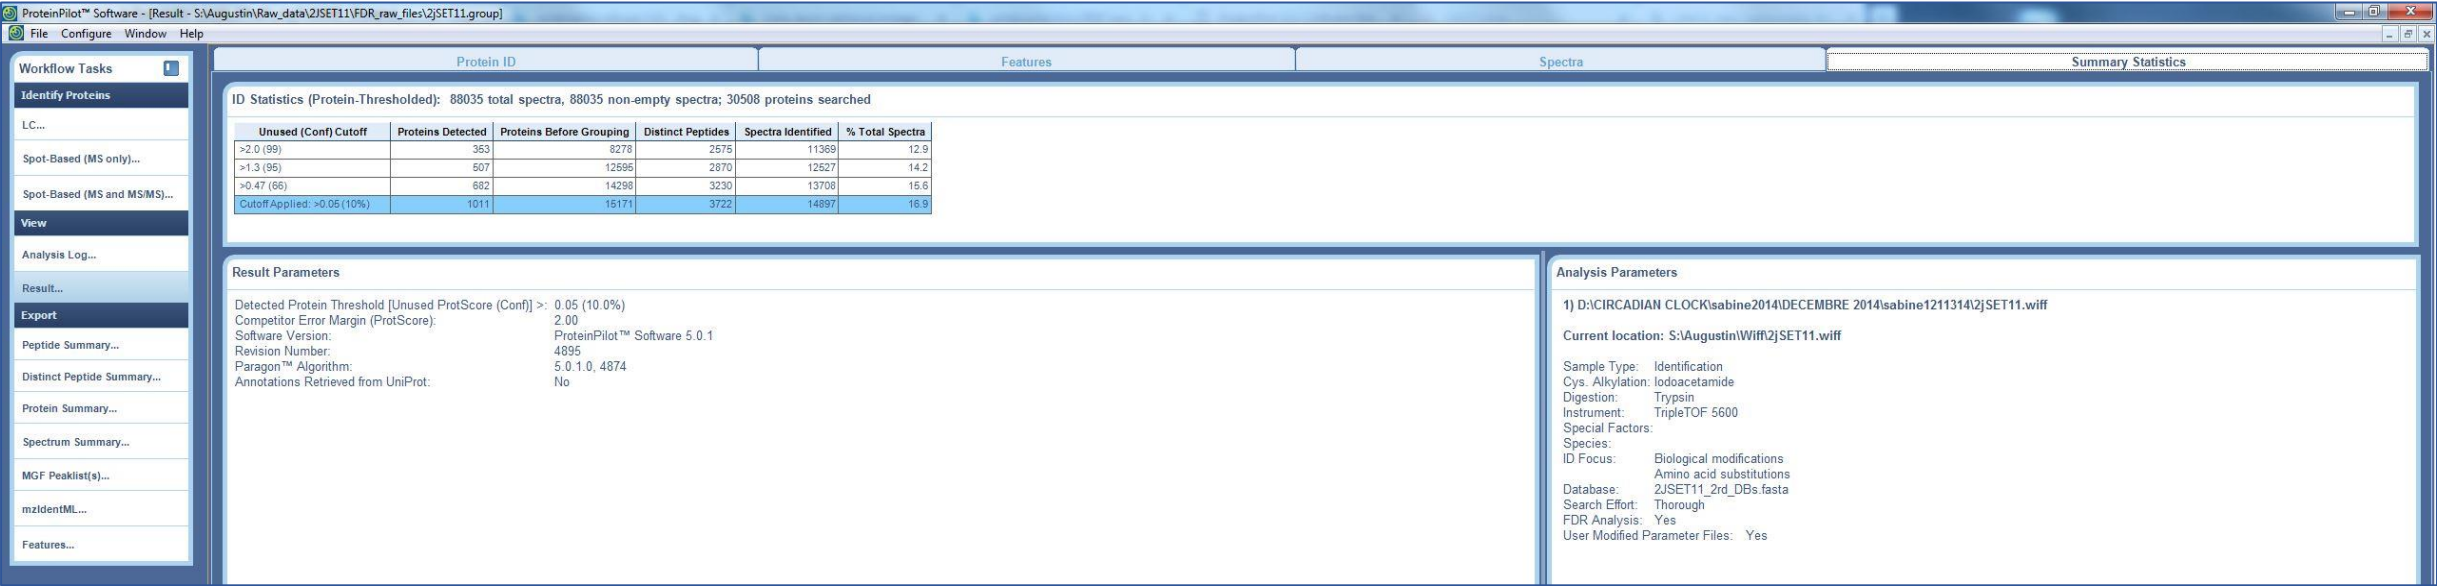

# Sample name: 2nSET12 - Metaproteome name: free-living night 1

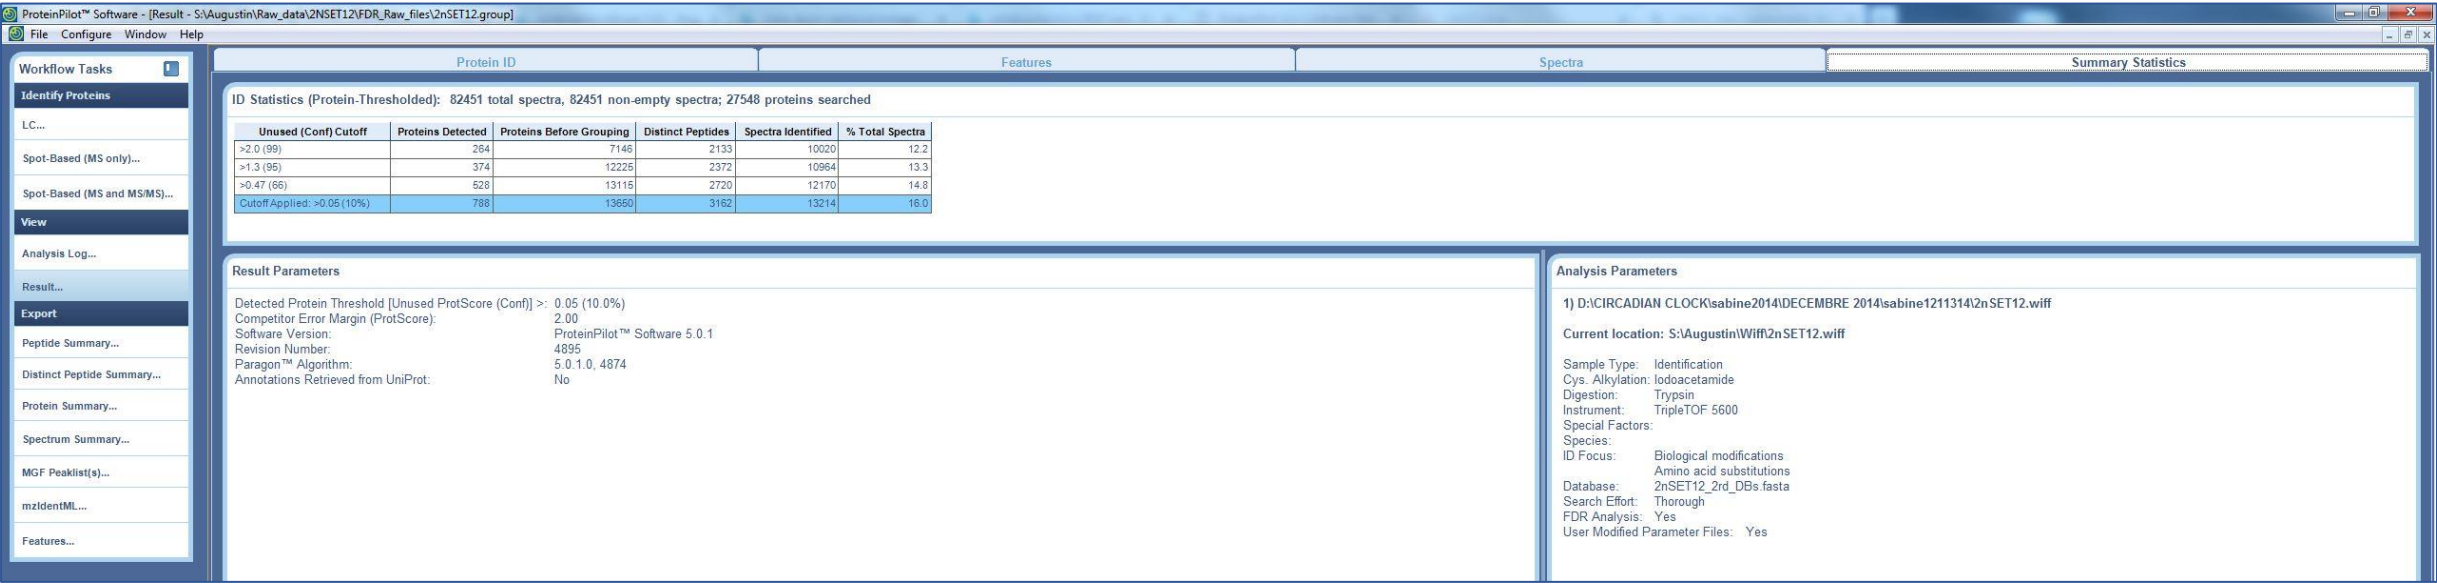

Sample name: 2j2SET13 - Metaproteome name: free-living day 2

Workflow Tasks

Identify Proteins

LC...

Spot-Based (MS only)...

Spot-Based (MS and MS/MS)...

View

Analysis Log...

Result...

Export

Peptide Summary...

Distinct Peptide Summary...

Protein Summary...

Spectrum Summary...

MGF Peaklist(s)...

mzIdentML...

Features...

Protein ID

Features

Spectra

Summary Statistics

ID Statistics (Protein-Thresholded): 75910 total spectra, 75910 non-empty spectra; 37008 proteins searched

| Unused (Conf) Cutoff        | Proteins Detected | Proteins Before Grouping | Distinct Peptides | Spectra Identified | % Total Spectra |
|-----------------------------|-------------------|--------------------------|-------------------|--------------------|-----------------|
| >2.0 (99)                   | 323               | 9120                     | 2112              | 9270               | 12.2            |
| >1.3 (95)                   | 472               | 14535                    | 2391              | 10325              | 13.6            |
| >0.47 (66)                  | 613               | 17231                    | 2641              | 11289              | 14.9            |
| Cutoff Applied: >0.05 (10%) | 881               | 17627                    | 3017              | 12169              | 16.0            |

Result Parameters

Detected Protein Threshold [Unused ProtScore (Conf)] >: 0.05 (10.0%)  
Competitor Error Margin (ProtScore): 2.00  
Software Version: ProteinPilot™ Software 5.0.1  
Revision Number: 4895  
Paragon™ Algorithm: 5.0.1.0, 4874  
Annotations Retrieved from UniProt: No

Analysis Parameters

1) D:\CIRCADIAN CLOCK\isabine2014\DECEMBRE 2014\isabine1211314\2j2SET13.wiff

Current location: S:\Augustin\Wiff\2j2SET13.wiff

Sample Type: Identification  
Cys. Alkylation: Iodoacetamide  
Digestion: Trypsin  
Instrument: TripleTOF 5600  
Special Factors:  
Species:  
ID Focus: Biological modifications  
Amino acid substitutions  
Database: 2j2SET13\_2rd\_DBs.fasta  
Search Effort: Thorough  
FDR Analysis: Yes  
User Modified Parameter Files: Yes

Sample name: 2n2SET14 - Metaproteome name: free-living night 2

Workflow Tasks

Identify Proteins

LC...

Spot-Based (MS only)...

Spot-Based (MS and MS/MS)...

View

Analysis Log...

Result...

Export

Peptide Summary...

Distinct Peptide Summary...

Protein Summary...

Spectrum Summary...

MGF Peaklist(s)...

mzIdentML...

Features...

Protein ID

Features

Spectra

Summary Statistics

ID Statistics (Protein-Thresholded): 72101 total spectra, 72101 non-empty spectra; 30876 proteins searched

| Unused (Conf) Cutoff        | Proteins Detected | Proteins Before Grouping | Distinct Peptides | Spectra Identified | % Total Spectra |
|-----------------------------|-------------------|--------------------------|-------------------|--------------------|-----------------|
| >2.0 (99)                   | 284               | 9789                     | 2070              | 9729               | 13.5            |
| >1.3 (95)                   | 420               | 13691                    | 2344              | 10721              | 14.9            |
| >0.47 (66)                  | 554               | 14470                    | 2636              | 11533              | 16.0            |
| Cutoff Applied: >0.05 (10%) | 837               | 15288                    | 3085              | 12643              | 17.4            |

Result Parameters

Detected Protein Threshold [Unused ProtScore (Conf)] >: 0.05 (10.0%)  
Competitor Error Margin (ProtScore): 2.00  
Software Version: ProteinPilot™ Software 5.0.1  
Revision Number: 4895  
Paragon™ Algorithm: 5.0.1.0, 4874  
Annotations Retrieved from UniProt: No

Analysis Parameters

1) D:\CIRCADIAN CLOCK\isabine2014\DECEMBRE 2014\isabine1211314\2n2SET14.wiff

Current location: S:\Augustin\Wiff\2n2SET14.wiff

Sample Type: Identification  
Cys. Alkylation: Iodoacetamide  
Digestion: Trypsin  
Instrument: TripleTOF 5600  
Special Factors:  
Species:  
ID Focus: Biological modifications  
Amino acid substitutions  
Database: 2n2SET14\_2rd\_DBs.fasta  
Search Effort: Thorough  
FDR Analysis: Yes  
User Modified Parameter Files: Yes
