# Supplementary material for: Diel Protein Regulation of Marine Picoplanktonic Communities Assessed by Metaproteomics
Source: MDPI journal article supplement (doi:10.3390/microorganisms9122621), 2021-12-18
Supplement: s1 [file s1]

ProteinPilot™ Software Report

Template Version 1.00 light report

Summary of Identification Yields

Identification Yield  
at FDR Threshold

| Data Level       | FDR Type | FDR | ID Yield |
|------------------|----------|-----|----------|
| Protein          | Local    | 1%  | 514      |
|                  |          | 5%  | 569      |
|                  |          | 10% | 603      |
|                  | Global   | 1%  | 620      |
|                  |          | 5%  | 776      |
|                  |          | 10% | 916      |
| Distinct peptide | Local    | 1%  | 888      |
|                  |          | 5%  | 1445     |
|                  |          | 10% | 2017     |
|                  | Global   | 1%  | 1368     |
|                  |          | 5%  | 2569     |
|                  |          | 10% | 3847     |
| Spectral         | Local    | 1%  | 4576     |
|                  |          | 5%  | 7115     |
|                  |          | 10% | 9007     |
|                  | Global   | 1%  | 6957     |
|                  |          | 5%  | 11435    |
|                  |          | 10% | 14223    |
|                  |          |     |          |

Corresponding Confidence in  
ProteinPilot™ Software

|                  |        |     |       |
|------------------|--------|-----|-------|
| Protein          | Local  | 1%  | 94.5% |
|                  |        | 5%  | 88.3% |
|                  |        | 10% | 83.0% |
|                  | Global | 1%  | 80.0% |
|                  |        | 5%  | 42.5% |
|                  |        | 10% | 20.6% |
| Distinct peptide | Local  | 1%  | 99.4% |
|                  |        | 5%  | 95.7% |
|                  |        | 10% | 78.0% |
|                  | Global | 1%  | 96.7% |
|                  |        | 5%  | 52.8% |
|                  |        | 10% | 11.8% |
| Spectral         | Local  | 1%  | 98.5% |
|                  |        | 5%  | 89.1% |
|                  |        | 10% | 69.9% |
|                  | Global | 1%  | 90.3% |
|                  |        | 5%  | 46.2% |
|                  |        | 10% | 18.0% |

Search Properties

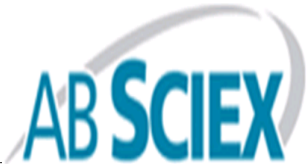

General

|                |                     |
|----------------|---------------------|
| Group filename | 2jSET11.group       |
| Start date     | 22-01-19            |
| Start time     | 01/22/2019 11:34:00 |
| User name      | PC26635\Sabine      |

Search Input

|                             |       |
|-----------------------------|-------|
| Number of spectra in search | 88035 |
| Number of input files       | 1     |

Search Method

|                                                   |                                                    |
|---------------------------------------------------|----------------------------------------------------|
| Sample Type                                       | Identification                                     |
| Cysteine Alkylation                               | Iodoacetamide                                      |
| Digestion                                         | Trypsin                                            |
| Special Factors                                   |                                                    |
| Instrument                                        | TripleTOF 5600                                     |
| Species                                           |                                                    |
| Search Effort                                     | Thorough                                           |
| ID Focus                                          | Biological modifications; Amino acid substitutions |
| FDR Analysis                                      | Yes                                                |
| Quantitation                                      |                                                    |
| Background Correction                             | No                                                 |
| Bias Correction                                   | Yes                                                |
| Channel to use as denominator in ratios           |                                                    |
| Modified Data Dictionary or Parameter Translation | Yes                                                |

Database Searched

|                                |                                                                     |
|--------------------------------|---------------------------------------------------------------------|
| Database filename              | C:\AB SCIEX\ProteinPilot Data\SearchDatabases\2JSET11_2rd_DBs.fasta |
| Number of Proteins in Database | 15254                                                               |
| Number of proteins searched    | 30508                                                               |

Hardware and Software Environment

|                                                       |                                                  |
|-------------------------------------------------------|--------------------------------------------------|
| RAM (MB)                                              | 65458                                            |
| Computer name                                         | PC26635                                          |
| Number of cores in computer                           | 10                                               |
| Number of threads (double cores if hyperthreading on) | 20                                               |
| Number of cores licensed to use                       | 8                                                |
| Operating system                                      | Windows 7 Professional Service Pack 1 (6.1.7601) |
| ProteinPilot Software Version                         | 5.0.1.0, 4895                                    |
| Paragon Algorithm Version                             | 5.0.1.0, 4874                                    |

ProteinPilot™ Software Report

Template Version 1.00 light report

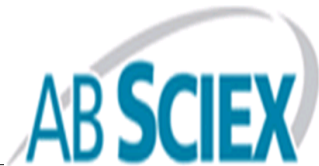

Summary of Identification Yields

Identification Yield  
at FDR Threshold

| Data Level       | FDR Type | FDR | ID Yield |
|------------------|----------|-----|----------|
| Protein          | Local    | 1%  | 392      |
|                  |          | 5%  | 437      |
|                  |          | 10% | 461      |
|                  | Global   | 1%  | 473      |
|                  |          | 5%  | 587      |
|                  |          | 10% | 740      |
| Distinct peptide | Local    | 1%  | 750      |
|                  |          | 5%  | 1190     |
|                  |          | 10% | 1630     |
|                  | Global   | 1%  | 1147     |
|                  |          | 5%  | 2095     |
|                  |          | 10% | 3177     |
| Spectral         | Local    | 1%  | 3723     |
|                  |          | 5%  | 6607     |
|                  |          | 10% | 8348     |
|                  | Global   | 1%  | 6033     |
|                  |          | 5%  | 10401    |
|                  |          | 10% | 12742    |
|                  |          |     |          |
| Protein          | Local    | 1%  | 93.1%    |
|                  |          | 5%  | 87.4%    |
|                  |          | 10% | 83.0%    |
|                  | Global   | 1%  | 79.6%    |
|                  |          | 5%  | 48.7%    |
|                  |          | 10% | 16.8%    |
| Distinct peptide | Local    | 1%  | 99.1%    |
|                  |          | 5%  | 94.9%    |
|                  |          | 10% | 81.1%    |
|                  | Global   | 1%  | 95.6%    |
|                  |          | 5%  | 54.7%    |
|                  |          | 10% | 14.3%    |
| Spectral         | Local    | 1%  | 98.6%    |
|                  |          | 5%  | 87.1%    |
|                  |          | 10% | 69.1%    |
|                  | Global   | 1%  | 90.7%    |
|                  |          | 5%  | 46.4%    |
|                  |          | 10% | 15.5%    |

Corresponding Confidence in  
ProteinPilot™ Software

Search Properties

General

|                |                     |
|----------------|---------------------|
| Group filename | 2nSET12.group       |
| Start date     | 22-01-19            |
| Start time     | 01/22/2019 11:35:16 |
| User name      | PC26635\Sabine      |

Search Input

|                             |       |
|-----------------------------|-------|
| Number of spectra in search | 82451 |
| Number of input files       | 1     |

Search Method

|                                                   |                                                    |
|---------------------------------------------------|----------------------------------------------------|
| Sample Type                                       | Identification                                     |
| Cysteine Alkylation                               | Iodoacetamide                                      |
| Digestion                                         | Trypsin                                            |
| Special Factors                                   |                                                    |
| Instrument                                        | TripleTOF 5600                                     |
| Species                                           |                                                    |
| Search Effort                                     | Thorough                                           |
| ID Focus                                          | Biological modifications; Amino acid substitutions |
| FDR Analysis                                      | Yes                                                |
| Quantitation                                      |                                                    |
| Background Correction                             | No                                                 |
| Bias Correction                                   | Yes                                                |
| Channel to use as denominator in ratios           |                                                    |
| Modified Data Dictionary or Parameter Translation | Yes                                                |

Database Searched

|                                |                                                                     |
|--------------------------------|---------------------------------------------------------------------|
| Database filename              | C:\AB SCIEX\ProteinPilot Data\SearchDatabases\2nSET12_2rd_DBs.fasta |
| Number of Proteins in Database | 13774                                                               |
| Number of proteins searched    | 27548                                                               |

Hardware and Software Environment

|                                                       |                                                  |
|-------------------------------------------------------|--------------------------------------------------|
| RAM (MB)                                              | 65458                                            |
| Computer name                                         | PC26635                                          |
| Number of cores in computer                           | 10                                               |
| Number of threads (double cores if hyperthreading on) | 20                                               |
| Number of cores licensed to use                       | 8                                                |
| Operating system                                      | Windows 7 Professional Service Pack 1 (6.1.7601) |
| ProteinPilot Software Version                         | 5.0.1.0, 4895                                    |
| Paragon Algorithm Version                             | 5.0.1.0, 4874                                    |

ProteinPilot™ Software Report

Template Version 1.00 light report

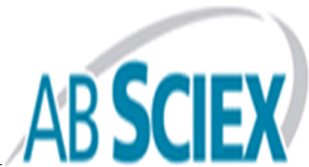

Summary of Identification Yields

Identification Yield  
at FDR Threshold

| Data Level       | FDR Type | FDR | ID Yield |
|------------------|----------|-----|----------|
| Protein          | Local    | 1%  | 505      |
|                  |          | 5%  | 507      |
|                  |          | 10% | 550      |
|                  | Global   | 1%  | 568      |
|                  |          | 5%  | 720      |
|                  |          | 10% | 846      |
| Distinct peptide | Local    | 1%  | 1048     |
|                  |          | 5%  | 1181     |
|                  |          | 10% | 1775     |
|                  | Global   | 1%  | 1328     |
|                  |          | 5%  | 2342     |
|                  |          | 10% | 3954     |
| Spectral         | Local    | 1%  | 3884     |
|                  |          | 5%  | 6060     |
|                  |          | 10% | 7610     |
|                  | Global   | 1%  | 5903     |
|                  |          | 5%  | 9616     |
|                  |          | 10% | 11818    |

Corresponding Confidence in  
ProteinPilot™ Software

|                  |        |     |       |
|------------------|--------|-----|-------|
| Protein          | Local  | 1%  | 90.7% |
|                  |        | 5%  | 90.5% |
|                  |        | 10% | 83.0% |
|                  | Global | 1%  | 78.1% |
|                  |        | 5%  | 36.9% |
|                  |        | 10% | 14.9% |
| Distinct peptide | Local  | 1%  | 98.4% |
|                  |        | 5%  | 97.1% |
|                  |        | 10% | 81.6% |
|                  | Global | 1%  | 95.4% |
|                  |        | 5%  | 46.4% |
|                  |        | 10% | 0.1%  |
| Spectral         | Local  | 1%  | 98.9% |
|                  |        | 5%  | 91.6% |
|                  |        | 10% | 77.5% |
|                  | Global | 1%  | 92.8% |
|                  |        | 5%  | 50.8% |
|                  |        | 10% | 15.5% |

Search Properties

General

|                |                     |
|----------------|---------------------|
| Group filename | 2j2SET13.group      |
| Start date     | 22-01-19            |
| Start time     | 01/22/2019 11:33:21 |
| User name      | PC26635\Sabine      |

Search Input

|                             |       |
|-----------------------------|-------|
| Number of spectra in search | 75910 |
| Number of input files       | 1     |

Search Method

|                                                   |                                                    |
|---------------------------------------------------|----------------------------------------------------|
| Sample Type                                       | Identification                                     |
| Cysteine Alkylation                               | Iodoacetamide                                      |
| Digestion                                         | Trypsin                                            |
| Special Factors                                   |                                                    |
| Instrument                                        | TripleTOF 5600                                     |
| Species                                           |                                                    |
| Search Effort                                     | Thorough                                           |
| ID Focus                                          | Biological modifications; Amino acid substitutions |
| FDR Analysis                                      | Yes                                                |
| Quantitation                                      |                                                    |
| Background Correction                             | No                                                 |
| Bias Correction                                   | Yes                                                |
| Channel to use as denominator in ratios           |                                                    |
| Modified Data Dictionary or Parameter Translation | Yes                                                |

Database Searched

|                                |                                                                      |
|--------------------------------|----------------------------------------------------------------------|
| Database filename              | C:\AB SCIEX\ProteinPilot Data\SearchDatabases\2J2SET13_2rd_DBs.fasta |
| Number of Proteins in Database | 18504                                                                |
| Number of proteins searched    | 37008                                                                |

Hardware and Software Environment

|                                                       |                                                  |
|-------------------------------------------------------|--------------------------------------------------|
| RAM (MB)                                              | 65458                                            |
| Computer name                                         | PC26635                                          |
| Number of cores in computer                           | 10                                               |
| Number of threads (double cores if hyperthreading on) | 20                                               |
| Number of cores licensed to use                       | 8                                                |
| Operating system                                      | Windows 7 Professional Service Pack 1 (6.1.7601) |
| ProteinPilot Software Version                         | 5.0.1.0, 4895                                    |
| Paragon Algorithm Version                             | 5.0.1.0, 4874                                    |

ProteinPilot™ Software Report

Template Version 1.00 light report

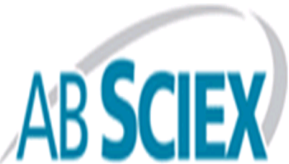

Summary of Identification Yields

| Data Level       |        | FDR Type | FDR | ID Yield |
|------------------|--------|----------|-----|----------|
| Protein          | Local  |          | 1%  | 411      |
|                  |        |          | 5%  | 452      |
|                  |        |          | 10% | 473      |
|                  | Global |          | 1%  | 485      |
|                  |        |          | 5%  | 592      |
|                  |        |          | 10% | 772      |
| Distinct peptide | Local  |          | 1%  | 707      |
|                  |        |          | 5%  | 1131     |
|                  |        |          | 10% | 1570     |
|                  | Global |          | 1%  | 1082     |
|                  |        |          | 5%  | 2012     |
|                  |        |          | 10% | 3124     |
| Spectral         | Local  |          | 1%  | 4234     |
|                  |        |          | 5%  | 6353     |
|                  |        |          | 10% | 7827     |
|                  | Global |          | 1%  | 6331     |
|                  |        |          | 5%  | 9918     |
|                  |        |          | 10% | 12121    |
|                  |        |          |     |          |
| Protein          | Local  |          | 1%  | 95.9%    |
|                  |        |          | 5%  | 91.5%    |
|                  |        |          | 10% | 88.0%    |
|                  | Global |          | 1%  | 85.9%    |
|                  |        |          | 5%  | 55.3%    |
|                  |        |          | 10% | 18.7%    |
| Distinct peptide | Local  |          | 1%  | 99.6%    |
|                  |        |          | 5%  | 96.2%    |
|                  |        |          | 10% | 80.0%    |
|                  | Global |          | 1%  | 97.0%    |
|                  |        |          | 5%  | 54.3%    |
|                  |        |          | 10% | 12.9%    |
| Spectral         | Local  |          | 1%  | 98.6%    |
|                  |        |          | 5%  | 87.5%    |
|                  |        |          | 10% | 68.4%    |
|                  | Global |          | 1%  | 87.9%    |
|                  |        |          | 5%  | 40.4%    |
|                  |        |          | 10% | 17.4%    |

Search Properties

General

|                |                     |
|----------------|---------------------|
| Group filename | 2n2SET14.group      |
| Start date     | 22-01-19            |
| Start time     | 01/22/2019 11:34:41 |
| User name      | PC26635\Sabine      |

Search Input

|                             |       |
|-----------------------------|-------|
| Number of spectra in search | 72101 |
| Number of input files       | 1     |

Search Method

|                                                   |                                                    |
|---------------------------------------------------|----------------------------------------------------|
| Sample Type                                       | Identification                                     |
| Cysteine Alkylation                               | Iodoacetamide                                      |
| Digestion                                         | Trypsin                                            |
| Special Factors                                   |                                                    |
| Instrument                                        | TripleTOF 5600                                     |
| Species                                           |                                                    |
| Search Effort                                     | Thorough                                           |
| ID Focus                                          | Biological modifications; Amino acid substitutions |
| FDR Analysis                                      | Yes                                                |
| Quantitation                                      |                                                    |
| Background Correction                             | No                                                 |
| Bias Correction                                   | Yes                                                |
| Channel to use as denominator in ratios           |                                                    |
| Modified Data Dictionary or Parameter Translation | Yes                                                |

Database Searched

|                                |                                                                      |
|--------------------------------|----------------------------------------------------------------------|
| Database filename              | C:\AB SCIEX\ProteinPilot Data\SearchDatabases\2n2SET14_2rd_DBs.fasta |
| Number of Proteins in Database | 15438                                                                |
| Number of proteins searched    | 30876                                                                |

Hardware and Software Environment

|                                                       |                                                  |
|-------------------------------------------------------|--------------------------------------------------|
| RAM (MB)                                              | 65458                                            |
| Computer name                                         | PC26635                                          |
| Number of cores in computer                           | 10                                               |
| Number of threads (double cores if hyperthreading on) | 20                                               |
| Number of cores licensed to use                       | 8                                                |
| Operating system                                      | Windows 7 Professional Service Pack 1 (6.1.7601) |
| ProteinPilot Software Version                         | 5.0.1.0, 4895                                    |
| Paragon Algorithm Version                             | 5.0.1.0, 4874                                    |

Identification Yield  
at FDR Threshold

Corresponding Confidence in  
ProteinPilot™ Software

ProteinPilot™ Software Report

Template Version 1.00 light report

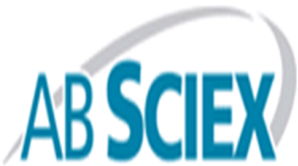

Summary of Identification Yields

| Data Level       | FDR Type | FDR | ID Yield |
|------------------|----------|-----|----------|
| Protein          | Local    | 1%  | 0        |
|                  |          | 5%  | 0        |
|                  |          | 10% | 0        |
|                  | Global   | 1%  | 161      |
|                  |          | 5%  | 161      |
|                  |          | 10% | 161      |
| Distinct peptide | Local    | 1%  | 680      |
|                  |          | 5%  | 680      |
|                  |          | 10% | 680      |
|                  | Global   | 1%  | 1160     |
|                  |          | 5%  | 1160     |
|                  |          | 10% | 1160     |
| Spectral         | Local    | 1%  | 390      |
|                  |          | 5%  | 624      |
|                  |          | 10% | 797      |
|                  | Global   | 1%  | 601      |
|                  |          | 5%  | 1007     |
|                  |          | 10% | 1278     |
|                  |          |     |          |
| Protein          | Local    | 1%  |          |
|                  |          | 5%  |          |
|                  |          | 10% |          |
|                  | Global   | 1%  | 10.9%    |
|                  |          | 5%  | 10.9%    |
|                  |          | 10% | 10.9%    |
| Distinct peptide | Local    | 1%  | 12.4%    |
|                  |          | 5%  | 12.4%    |
|                  |          | 10% | 12.4%    |
|                  | Global   | 1%  | 0.1%     |
|                  |          | 5%  | 0.1%     |
|                  |          | 10% | 0.1%     |
| Spectral         | Local    | 1%  | 99.9%    |
|                  |          | 5%  | 94.0%    |
|                  |          | 10% | 81.1%    |
|                  | Global   | 1%  | 95.4%    |
|                  |          | 5%  | 61.8%    |
|                  |          | 10% | 34.5%    |

Identification Yield  
at FDR Threshold

Corresponding Confidence in  
ProteinPilot™ Software

Search Properties

|                                                       |                                                                        |
|-------------------------------------------------------|------------------------------------------------------------------------|
| General                                               |                                                                        |
| Group filename                                        | 8jSET18(1).group                                                       |
| Start date                                            | 09-09-21                                                               |
| Start time                                            | 16:03:14                                                               |
| User name                                             | Bioprofil4\UMons                                                       |
| Search Input                                          |                                                                        |
| Number of spectra in search                           | 88177                                                                  |
| Number of input files                                 | 1                                                                      |
| Search Method                                         |                                                                        |
| Sample Type                                           | Identification                                                         |
| Cysteine Alkylation                                   | Iodoacetamide                                                          |
| Digestion                                             | Trypsin                                                                |
| Special Factors                                       |                                                                        |
| Instrument                                            | TripleTOF 5600                                                         |
| Species                                               |                                                                        |
| Search Effort                                         | Thorough                                                               |
| ID Focus                                              | Biological modifications; Amino acid substitutions                     |
| FDR Analysis                                          | No                                                                     |
| Quantitation                                          |                                                                        |
| Background Correction                                 | No                                                                     |
| Bias Correction                                       | No                                                                     |
| Channel to use as denominator in ratios               |                                                                        |
| Modified Data Dictionary or Parameter Translation     | No                                                                     |
| Database Searched                                     |                                                                        |
| Database filename                                     | C:\AB SCIEX\ProteinPilot Data\SearchDatabases\08_Second_round_DB.fasta |
| Number of Proteins in Database                        | 20038                                                                  |
| Number of proteins searched                           | 20038                                                                  |
| Hardware and Software Environment                     |                                                                        |
| RAM (MB)                                              | 98225                                                                  |
| Computer name                                         | BIOPROFIL4                                                             |
| Number of cores in computer                           | 16                                                                     |
| Number of threads (double cores if hyperthreading on) | 32                                                                     |
| Number of cores licensed to use                       | 16                                                                     |
| Operating system                                      | Windows 7 Professional Service Pack 1 (6.1.7601)                       |
| ProteinPilot Software Version                         | 5.0.1.0, 4895                                                          |
| Paragon Algorithm Version                             | 5.0.1.0, 4874                                                          |

ProteinPilot™ Software Report

Template Version 1.00 light report

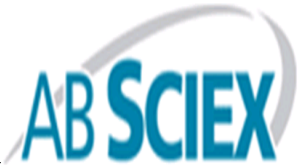

Identification Yield  
at FDR Threshold

Corresponding Confidence in  
ProteinPilot™ Software

| Summary of Identification Yields |          |     |          |
|----------------------------------|----------|-----|----------|
| Data Level                       | FDR Type | FDR | ID Yield |
| Protein                          | Local    | 1%  | 0        |
|                                  |          | 5%  | 0        |
|                                  |          | 10% | 0        |
|                                  | Global   | 1%  | 182      |
|                                  |          | 5%  | 182      |
|                                  |          | 10% | 182      |
| Distinct peptide                 | Local    | 1%  | 670      |
|                                  |          | 5%  | 670      |
|                                  |          | 10% | 670      |
|                                  | Global   | 1%  | 1219     |
|                                  |          | 5%  | 1219     |
|                                  |          | 10% | 1219     |
| Spectral                         | Local    | 1%  | 1142     |
|                                  |          | 5%  | 1662     |
|                                  |          | 10% | 1874     |
|                                  | Global   | 1%  | 1619     |
|                                  |          | 5%  | 2275     |
|                                  |          | 10% | 2603     |
|                                  |          |     |          |
| Protein                          | Local    | 1%  |          |
|                                  |          | 5%  |          |
|                                  |          | 10% |          |
|                                  | Global   | 1%  | 10.9%    |
|                                  |          | 5%  | 10.9%    |
|                                  |          | 10% | 10.9%    |
| Distinct peptide                 | Local    | 1%  | 21.1%    |
|                                  |          | 5%  | 21.1%    |
|                                  |          | 10% | 21.1%    |
|                                  | Global   | 1%  | 0.1%     |
|                                  |          | 5%  | 0.1%     |
|                                  |          | 10% | 0.1%     |
| Spectral                         | Local    | 1%  | 99.7%    |
|                                  |          | 5%  | 85.9%    |
|                                  |          | 10% | 70.2%    |
|                                  | Global   | 1%  | 89.3%    |
|                                  |          | 5%  | 35.3%    |
|                                  |          | 10% | 18.0%    |

Search Properties

| General                                               |                                                                        |
|-------------------------------------------------------|------------------------------------------------------------------------|
| Group filename                                        | 8nSET19.group                                                          |
| Start date                                            | 09-09-21                                                               |
| Start time                                            | 16:03:42                                                               |
| User name                                             | Bioprofil4\UMons                                                       |
| Search Input                                          |                                                                        |
| Number of spectra in search                           | 87643                                                                  |
| Number of input files                                 | 1                                                                      |
| Search Method                                         |                                                                        |
| Sample Type                                           | Identification                                                         |
| Cysteine Alkylation                                   | Iodoacetamide                                                          |
| Digestion                                             | Trypsin                                                                |
| Special Factors                                       |                                                                        |
| Instrument                                            | TripleTOF 5600                                                         |
| Species                                               |                                                                        |
| Search Effort                                         | Thorough                                                               |
| ID Focus                                              | Biological modifications; Amino acid substitutions                     |
| FDR Analysis                                          | No                                                                     |
| Quantitation                                          |                                                                        |
| Background Correction                                 | No                                                                     |
| Bias Correction                                       | No                                                                     |
| Channel to use as denominator in ratios               |                                                                        |
| Modified Data Dictionary or Parameter Translation     | No                                                                     |
| Database Searched                                     |                                                                        |
| Database filename                                     | C:\AB SCIEX\ProteinPilot Data\SearchDatabases\08_Second_round_DB.fasta |
| Number of Proteins in Database                        | 20038                                                                  |
| Number of proteins searched                           | 20038                                                                  |
| Hardware and Software Environment                     |                                                                        |
| RAM (MB)                                              | 98225                                                                  |
| Computer name                                         | BIOPROFIL4                                                             |
| Number of cores in computer                           | 16                                                                     |
| Number of threads (double cores if hyperthreading on) | 32                                                                     |
| Number of cores licensed to use                       | 16                                                                     |
| Operating system                                      | Windows 7 Professional Service Pack 1 (6.1.7601)                       |
| ProteinPilot Software Version                         | 5.0.1.0, 4895                                                          |
| Paragon Algorithm Version                             | 5.0.1.0, 4874                                                          |

ProteinPilot™ Software Report

Template Version 1.00 light report

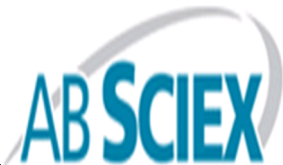

Summary of Identification Yields

Identification Yield  
at FDR Threshold

Corresponding Confidence in  
ProteinPilot™ Software

| Data Level       | FDR Type | FDR | ID Yield |
|------------------|----------|-----|----------|
| Protein          | Local    | 1%  | 0        |
|                  |          | 5%  | 0        |
|                  |          | 10% | 0        |
|                  | Global   | 1%  | 197      |
|                  |          | 5%  | 197      |
|                  |          | 10% | 197      |
| Distinct peptide | Local    | 1%  | 1455     |
|                  |          | 5%  | 1455     |
|                  |          | 10% | 1455     |
|                  | Global   | 1%  | 1681     |
|                  |          | 5%  | 1681     |
|                  |          | 10% | 1681     |
| Spectral         | Local    | 1%  | 1580     |
|                  |          | 5%  | 2197     |
|                  |          | 10% | 2476     |
|                  | Global   | 1%  | 2262     |
|                  |          | 5%  | 3049     |
|                  |          | 10% | 3488     |
|                  |          |     |          |
| Protein          | Local    | 1%  |          |
|                  |          | 5%  |          |
|                  |          | 10% |          |
|                  | Global   | 1%  | 10.9%    |
|                  |          | 5%  | 10.9%    |
|                  |          | 10% | 10.9%    |
| Distinct peptide | Local    | 1%  | 4.0%     |
|                  |          | 5%  | 4.0%     |
|                  |          | 10% | 4.0%     |
|                  | Global   | 1%  | 0.1%     |
|                  |          | 5%  | 0.1%     |
|                  |          | 10% | 0.1%     |
| Spectral         | Local    | 1%  | 99.4%    |
|                  |          | 5%  | 86.1%    |
|                  |          | 10% | 72.6%    |
|                  | Global   | 1%  | 84.6%    |
|                  |          | 5%  | 37.6%    |
|                  |          | 10% | 16.5%    |

Search Properties

General

|                |                  |
|----------------|------------------|
| Group filename | 8j2SET110.group  |
| Start date     | 09-09-21         |
| Start time     | 16:03:28         |
| User name      | Bioprofil4\UMons |

Search Input

|                             |       |
|-----------------------------|-------|
| Number of spectra in search | 86844 |
| Number of input files       | 1     |

Search Method

|                                                   |                                                    |
|---------------------------------------------------|----------------------------------------------------|
| Sample Type                                       | Identification                                     |
| Cysteine Alkylation                               | Iodoacetamide                                      |
| Digestion                                         | Trypsin                                            |
| Special Factors                                   |                                                    |
| Instrument                                        | TripleTOF 5600                                     |
| Species                                           |                                                    |
| Search Effort                                     | Thorough                                           |
| ID Focus                                          | Biological modifications; Amino acid substitutions |
| FDR Analysis                                      | No                                                 |
| Quantitation                                      |                                                    |
| Background Correction                             | No                                                 |
| Bias Correction                                   | No                                                 |
| Channel to use as denominator in ratios           |                                                    |
| Modified Data Dictionary or Parameter Translation | No                                                 |

Database Searched

|                                |                                                                        |
|--------------------------------|------------------------------------------------------------------------|
| Database filename              | C:\AB SCIEX\ProteinPilot Data\SearchDatabases\08_Second_round_DB.fasta |
| Number of Proteins in Database | 20038                                                                  |
| Number of proteins searched    | 20038                                                                  |

Hardware and Software Environment

|                                                       |                                                  |
|-------------------------------------------------------|--------------------------------------------------|
| RAM (MB)                                              | 98225                                            |
| Computer name                                         | BIOPROFIL4                                       |
| Number of cores in computer                           | 16                                               |
| Number of threads (double cores if hyperthreading on) | 32                                               |
| Number of cores licensed to use                       | 16                                               |
| Operating system                                      | Windows 7 Professional Service Pack 1 (6.1.7601) |
| ProteinPilot Software Version                         | 5.0.1.0, 4895                                    |
| Paragon Algorithm Version                             | 5.0.1.0, 4874                                    |

ProteinPilot™ Software Report

Template Version 1.00 light report

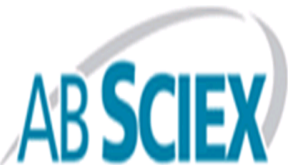

Summary of Identification Yields

Identification Yield  
at FDR Threshold

| Data Level       | FDR Type | FDR | ID Yield |
|------------------|----------|-----|----------|
| Protein          | Local    | 1%  | 190      |
|                  |          | 5%  | 190      |
|                  |          | 10% | 192      |
|                  | Global   | 1%  | 225      |
|                  |          | 5%  | 235      |
|                  |          | 10% | 235      |
| Distinct peptide | Local    | 1%  | 639      |
|                  |          | 5%  | 639      |
|                  |          | 10% | 639      |
|                  | Global   | 1%  | 1858     |
|                  |          | 5%  | 1858     |
|                  |          | 10% | 1858     |
| Spectral         | Local    | 1%  | 1977     |
|                  |          | 5%  | 2693     |
|                  |          | 10% | 3016     |
|                  | Global   | 1%  | 2813     |
|                  |          | 5%  | 3705     |
|                  |          | 10% | 4255     |
|                  |          |     |          |

Corresponding Confidence in  
ProteinPilot™ Software

|                  |        |     |       |
|------------------|--------|-----|-------|
| Protein          | Local  | 1%  | 59.3% |
|                  |        | 5%  | 59.3% |
|                  |        | 10% | 53.2% |
|                  | Global | 1%  | 14.9% |
|                  |        | 5%  | 10.9% |
|                  |        | 10% | 10.9% |
| Distinct peptide | Local  | 1%  | 86.8% |
|                  |        | 5%  | 86.8% |
|                  |        | 10% | 86.8% |
|                  | Global | 1%  | 0.1%  |
|                  |        | 5%  | 0.1%  |
|                  |        | 10% | 0.1%  |
| Spectral         | Local  | 1%  | 99.2% |
|                  |        | 5%  | 88.8% |
|                  |        | 10% | 74.1% |
|                  | Global | 1%  | 82.9% |
|                  |        | 5%  | 32.2% |
|                  |        | 10% | 16.9% |

Search Properties

General

|                |                  |
|----------------|------------------|
| Group filename | 8n2SET111.group  |
| Start date     | 09-09-21         |
| Start time     | 16:03:57         |
| User name      | Bioprofil4\UMons |

Search Input

|                             |       |
|-----------------------------|-------|
| Number of spectra in search | 86537 |
| Number of input files       | 1     |

Search Method

|                                                   |                                                    |
|---------------------------------------------------|----------------------------------------------------|
| Sample Type                                       | Identification                                     |
| Cysteine Alkylation                               | Iodoacetamide                                      |
| Digestion                                         | Trypsin                                            |
| Special Factors                                   |                                                    |
| Instrument                                        | TripleTOF 5600                                     |
| Species                                           |                                                    |
| Search Effort                                     | Thorough                                           |
| ID Focus                                          | Biological modifications; Amino acid substitutions |
| FDR Analysis                                      | No                                                 |
| Quantitation                                      |                                                    |
| Background Correction                             | No                                                 |
| Bias Correction                                   | No                                                 |
| Channel to use as denominator in ratios           |                                                    |
| Modified Data Dictionary or Parameter Translation | No                                                 |

Database Searched

|                                |                                                                        |
|--------------------------------|------------------------------------------------------------------------|
| Database filename              | C:\AB SCIEX\ProteinPilot Data\SearchDatabases\08_Second_round_DB.fasta |
| Number of Proteins in Database | 20038                                                                  |
| Number of proteins searched    | 20038                                                                  |

Hardware and Software Environment

|                                                       |                                                  |
|-------------------------------------------------------|--------------------------------------------------|
| RAM (MB)                                              | 98225                                            |
| Computer name                                         | BIOPROFIL4                                       |
| Number of cores in computer                           | 16                                               |
| Number of threads (double cores if hyperthreading on) | 32                                               |
| Number of cores licensed to use                       | 16                                               |
| Operating system                                      | Windows 7 Professional Service Pack 1 (6.1.7601) |
| ProteinPilot Software Version                         | 5.0.1.0, 4895                                    |
| Paragon Algorithm Version                             | 5.0.1.0, 4874                                    |
